## Correction: Climate Cycles and Forecasts of Cutaneous Leishmaniasis, a Nonstationary Vector-Borne Disease

Luis Fernando Chaves, Mercedes Pascual

doi:10.1371/journal.pmed.0030295

In *PLoS Medicine*, volume 3, issue 8:

Equation 1 appeared incorrectly. It should read as:

$$y_t = \mu + \phi_1 (y_{t-1} - \mu) + \phi_{12} (y_{t-12} - \mu) - \phi_1 \phi_{12} (y_{t-13} - \mu) + \alpha_1 T_{t-4} + \gamma_a MEI_{t-13} + \varepsilon_t$$

The equations in the legend of Table 1 were also incorrect. The full model should be:

$$y_t = \mu + \phi_1 (y_{t-1} - \mu) + \phi_{12} (y_{t-12} - \mu) - \phi_1 \phi_{12} (y_{t-13} - \mu) + \alpha_1 T_{t-4} + \alpha_2 T_{t-13} + \alpha_3 T_{t-21} + \gamma_a MEI_{t-13} + \gamma_b SST4_{t-3} + \varepsilon_t$$

The null model should be:

$$y_t = \mu + \phi_1 (y_{t-1} - \mu) + \phi_{12} (y_{t-12} - \mu) - \phi_1 \phi_{12} (y_{t-13} - \mu) + \varepsilon_t$$

This correction note may be found online at doi:10.1371/journal.pmed.0040123.

Published March 27, 2007.

Citation: (2007) Correction: Climate cycles and forecasts of cutaneous leishmaniasis, a nonstationary vector-borne disease. *PLoS Med* 4(3): e123. doi:10.1371/journal.pmed.0040123
